# Supplementary material for: Preparation and application of amorphous Fe–Ti bimetal oxides for arsenic removal
Source: Royal Society of Chemistry journal article supplement (doi:10.1039/c5ra12039j), 2015-01-01
Supplement: c5ra12039j1.pdf [file c5ra12039j1.pdf]

## **Supplementary Information**

### **Preparation and application of amorphous Fe-Ti bimetal oxides for arsenic removal**

**Pinhua Rao<sup>a†</sup>, Zhaowei Sun<sup>a,b†</sup>, Wenqi Zhang<sup>a</sup>, Wei Yao<sup>a</sup>, Luanjiao Wang<sup>a</sup>,  
Guoyu Ding<sup>b,c\*</sup>**

<sup>a</sup> School of Chemistry and Chemical Engineering, Shanghai University of Engineering Science, Shanghai 201620, China

<sup>b</sup> School of Environment, Tsinghua University, Beijing 100084, China

<sup>c</sup> Beijing Municipal Research Institute of Environmental Protection, Beijing 10037, China

<sup>†</sup> Authors contributed equally.

\* Corresponding author's email: [dingguoyu@tsinghua.org.cn](mailto:dingguoyu@tsinghua.org.cn) (Guoyu Ding)

**Number of SI pages: 13**

**Number of tables: 5**

**Number of figures: 6**

## **Captions of Tables and Figures**

**Table S1 Fe:Ti molar ratio determined by classical chemical analysis**

**Table S2 Arsenic removal efficiency of bimetal oxides with different Fe:Ti molar ratios**

**Table S3 Freundlich and Langmuir isotherms parameters for As(III) and As(V) adsorption on BM-3**

**Table S4 Composition of different types of water samples**

**Table S5 Arsenic removal efficiency with different types of water samples**

**Fig. S1 XRD patterns of the bimetal oxides after heating at 600 °C.**

**Fig. S2 Dissolved Fe and Ti of BM-3 at different pHs.**

**Fig. S3 Zeta potential of BM-3 before and after As(III) and As(V) adsorption.**

**Fig. S4 Dosage effect of Fe-Ti bimetal oxides on Arsenic (III) removal.** Initial concentration of arsenic, 5 mg L<sup>-1</sup>; background electrolyte, 0.05 mol L<sup>-1</sup> NaCl; pH, 7.0±0.1.

**Fig. S5 Arsenic removal efficiencies of reused adsorbent**

**Fig. S6 (a) SEM, and (b) XRD of the adsorbent BM-3 after 3 times recycle.**



**Table S1 Fe:Ti molar ratio determined by classical chemical analysis**

| No. | Abbreviation | Molar ratio of Fe and Ti<br>determined |
|-----|--------------|----------------------------------------|
| 1   | S-Ti         | 0:1                                    |
| 2   | BM-1         | 0.17:0.83                              |
| 3   | BM-2         | 0.45:0.55                              |
| 4   | BM-3         | 0.78:0.22                              |
| 5   | S-Fe         | 1:0                                    |

The compositions of the bimetal oxides were determined by classical chemical analysis. An amount of the oxide was treated with concentrated sulfuric acid solution and at 80 °C. The oxide was dissolved to form Fe and Ti ions entered into the solution. The content of Fe and Ti was determined using an ICP-OES (700-ES, Varian). The molar ratios of Fe: Ti are shown in Table S1.

**Table S2 Arsenic removal efficiency of bimetal oxides with different Fe:Ti molar ratios**

| Adsorbent                     |                | S-Ti | BM-1 | BM-2 | BM-3 | S-Fe |
|-------------------------------|----------------|------|------|------|------|------|
| <b>Removal efficiency (%)</b> | <b>As(III)</b> | 75.3 | 89.8 | 93.4 | 96.5 | 86.8 |
|                               | <b>As(V)</b>   | 26.6 | 65.1 | 80.1 | 74.1 | 70.2 |

Note: Adsorbent dosage, 0.25 g L<sup>-1</sup>; initial arsenic concentration, 5.0 mg L<sup>-1</sup>; background electrolyte, 0.05 mol L<sup>-1</sup> NaCl; pH, 7.0±0.1.

**Table S3 Freundlich and Langmuir isotherms parameters for As(III) and As(V)**

**adsorption on BM-3**

| <b>Model</b>   | <b>Freundlich</b>    |          |                      | <b>Langmuir</b> |          |                      |
|----------------|----------------------|----------|----------------------|-----------------|----------|----------------------|
|                | <b>k<sub>d</sub></b> | <b>n</b> | <b>R<sup>2</sup></b> | <b>k</b>        | <b>b</b> | <b>R<sup>2</sup></b> |
| <b>As(III)</b> | 36.49                | 2.88     | 0.9950               | 0.44            | 111.37   | 0.9633               |
| <b>As(V)</b>   | 13.42                | 4.06     | 0.9736               | 0.64            | 31.42    | 0.9690               |

**Table S4 Composition of different types of water samples**

|                                                         | Surface water | Groundwater | Simulated water |
|---------------------------------------------------------|---------------|-------------|-----------------|
| pH                                                      | 7.2±0.1       | 7.3±0.1     | 7.0±0.1         |
| HCO <sub>3</sub> <sup>-</sup> (mg L <sup>-1</sup> )     | 112.2         | 173.1       | –               |
| Cl <sup>-</sup> (mg L <sup>-1</sup> )                   | 97.6          | 262.3       | 1775            |
| SO <sub>4</sub> <sup>2-</sup> (mg L <sup>-1</sup> )     | 50.2          | 99.0        | –               |
| PO <sub>4</sub> <sup>3-</sup> (mg L <sup>-1</sup> as P) | 0.023         | N.D.        | –               |

**Table S5 Arsenic removal efficiency with different types of water samples**

|                 | As(III) removal efficiency (%) | As(V) removal efficiency (%) |
|-----------------|--------------------------------|------------------------------|
| Surface water   | 86.63                          | 51.79                        |
| Groundwater     | 88.68                          | 54.07                        |
| Simulated water | 89.05                          | 55.00                        |

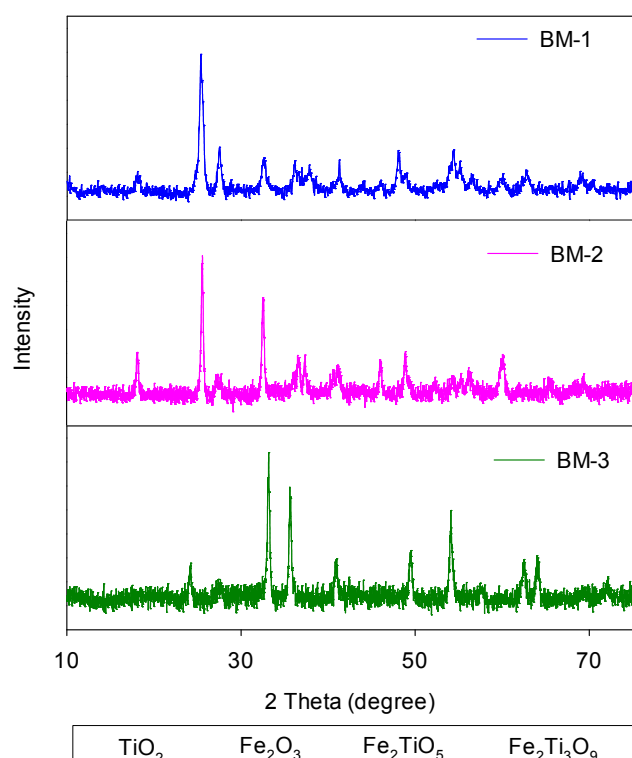

**Fig. S1 XRD patterns of the bimetal oxides after heating at 600 °C.**

No sharp peaks appeared in the XRD of the synthesized bimetal oxides, thus the bimetal oxides were heated to 600 °C. The XRD patterns of the heated bimetal oxides are displayed in Fig. S1. According to XRD library, peaks at 25.3°, 27.4°, 37.8°, 41.2°, 48.0°, 53.9°, 55.1°, and 62.7° are characteristic peaks of  $\text{TiO}_2$ ; peaks at 18.1°, 25.5°, 32.5°, 36.6°, 37.3°, 46.0°, 48.8°, and 59.8° are characteristic peaks of  $\text{Fe}_2\text{TiO}_5$ ; peaks at 32.1°, 36.2°, 41.3°, and 54.4° are characteristic peaks of  $\text{Fe}_2\text{Ti}_3\text{O}_9$ ; peaks at 24.1°, 33.2°, 35.6°, 40.9°, 49.5°, 54.1°, 62.4° and 64.0° are characteristic peaks of  $\text{Fe}_2\text{O}_3$ . Based on the abundance of peaks, BM-1 is mainly comprised of  $\text{TiO}_2$  with partial  $\text{Fe}_2\text{TiO}_5$  and a little  $\text{Fe}_2\text{Ti}_3\text{O}_9$ ; BM-2 mainly contains  $\text{Fe}_2\text{TiO}_5$  with partial  $\text{TiO}_2$  and a little  $\text{Fe}_2\text{Ti}_3\text{O}_9$ ; BM-3 is mainly  $\text{Fe}_2\text{O}_3$  with a little  $\text{TiO}_2$ . Without heating, all the oxides appeared in the amorphous form.

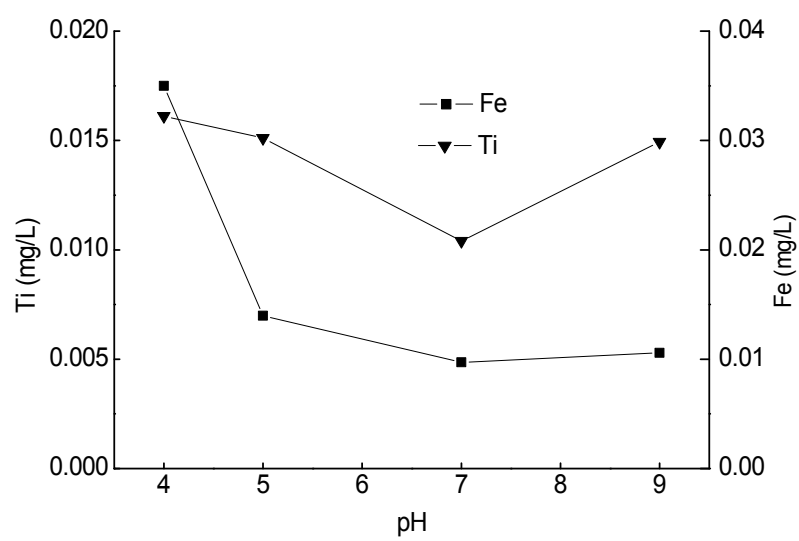

**Fig. S2 Dissolved Fe and Ti of BM-3 at different pHs.**

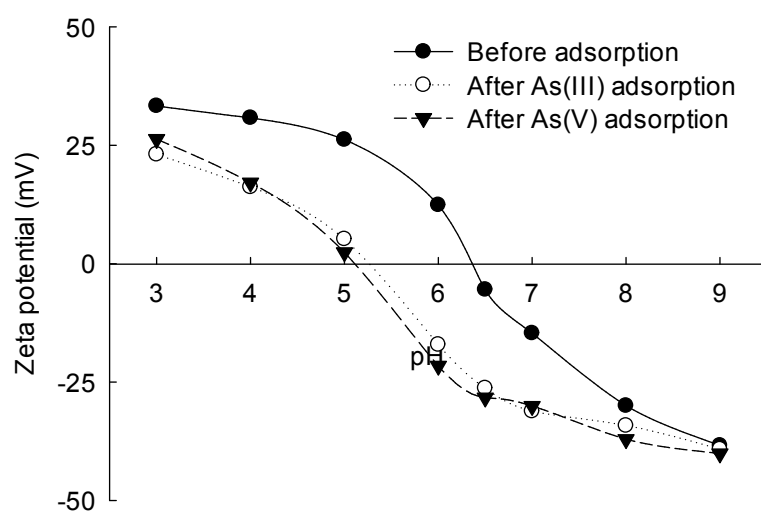

**Fig. S3 Zeta potential of BM-3 before and after As(III) and As(V) adsorption.**

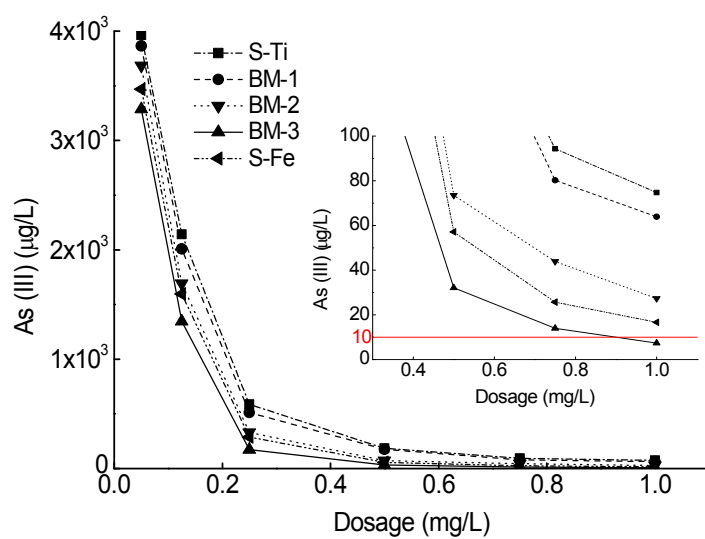

**Fig. S4 Dosage effect of Fe-Ti bimetal oxides on Arsenic (III) removal.** Initial concentration of arsenic, 5 mg L<sup>-1</sup>; background electrolyte, 0.05 mol L<sup>-1</sup> NaCl; pH, 7.0±0.1.

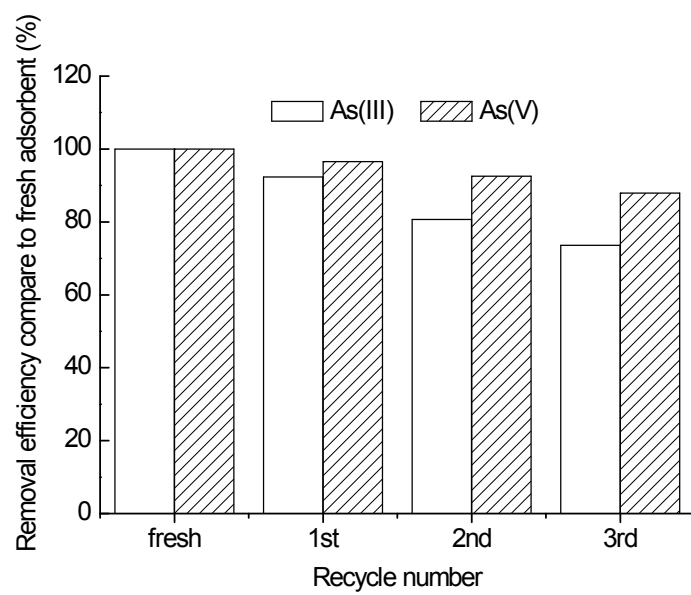

**Fig. S5 Arsenic removal efficiencies of reused adsorbent**

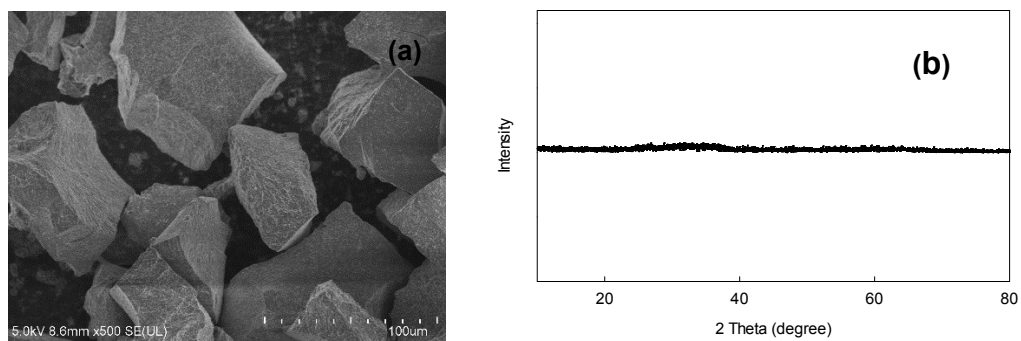

**Fig. S6 (a) SEM, and (b) XRD of the adsorbent BM-3 after 3 times recycle.**
